# Supplementary material for: Syntheses, crystal structures and antimicrobial activities of Cu(ii), Ru(ii), and Pt(ii) compounds with an anthracene-containing tripodal ligand
Source: Royal Society of Chemistry journal article supplement (doi:10.1039/c4ra09168j), 2015-01-01
Supplement: c4ra09168j1.pdf [file c4ra09168j1.pdf]

Electronic Supplementary Material (ESI) for RSC Advances.  
This journal is © The Royal Society of Chemistry 2014

---

**Supplementary Data**

**Syntheses, crystal structures and antimicrobial activities of  
copper(II), ruthenium(II) and platinum(II) compounds of  
anthracene-containing tripodal ligand**

Zeli Yuan <sup>a,b</sup>, Xiaomin Shen and Jiandong Huang <sup>a,\*</sup>

<sup>a</sup> College of Chemistry, Fuzhou University, Fuzhou 350108, China Tel.: +86 591 22866235; fax: +86 591 22866227; e-mail address: jdhuang@fzu.edu.cn (J.-D. Huang)

<sup>b</sup> School of Pharmacy, Zunyi Medical University, Zunyi, Guizhou, 563003, China. Tel.: +86 852 8608579; fax: +86 8528609343; e-mail address: zlyuan@zmc.edu.cn

*This submission was created using the RSC Template (DO NOT DELETE THIS TEXT)*  
*(LINE INCLUDED FOR SPACING ONLY - DO NOT DELETE THIS TEXT)*

### Table of Contents

|                                                                                                     |             |
|-----------------------------------------------------------------------------------------------------|-------------|
| <b>Fig. S1-S3</b> <sup>1</sup> H NMR of <b>ADPA</b> and compounds <b>2,3</b>                        | S1-S4       |
| <b>Fig. S4-S6</b> <sup>13</sup> C NMR of <b>ADPA</b> and compounds <b>2,3</b>                       | S5-S6       |
| <b>Fig. S7-S10</b> H RMS of <b>ADPA</b> and compounds <b>1-3</b>                                    | S7-S8       |
| <b>Fig. S11-S14</b> FT-IR of <b>ADPA</b> and compounds <b>1-3</b>                                   | S9-S10      |
| <b>Fig. S15</b> Absorption spectra of <b>ADPA</b> and compounds <b>1-3</b>                          | S10         |
| <b>Fig. S16-S17</b> The simulated and experimental PXRD patterns of compounds <b>1</b> and <b>3</b> | S10-<br>S11 |
| <b>Fig. S18-S20</b> TG curves of compounds <b>1-3</b>                                               | S11-<br>S12 |
| <b>Table S1</b> Pertinent crystal data and structure refinement results for compounds <b>1–3</b>    | S12         |
| <b>Table S2</b> Selected bond lengths (Å) and angles (°) for Compound <b>1</b>                      | S13         |
| <b>Table S3</b> Selected bond lengths (Å) and angles (°) for Compound <b>2</b>                      | S15         |
| <b>Table S4</b> Selected bond lengths (Å) and angles (°) for Compound <b>3</b>                      | S20         |
| <b>Table S5</b> Bond lengths (Å) and angles (°) of hydrogen bonds for Compound <b>1</b>             | S24         |
| <b>Table S6</b> Bond lengths (Å) and angles (°) of hydrogen bonds for Compound <b>2</b>             | S24         |
| <b>Table S7</b> Bond lengths (Å) and angles (°) of hydrogen bonds for Compound <b>3</b>             | S24         |



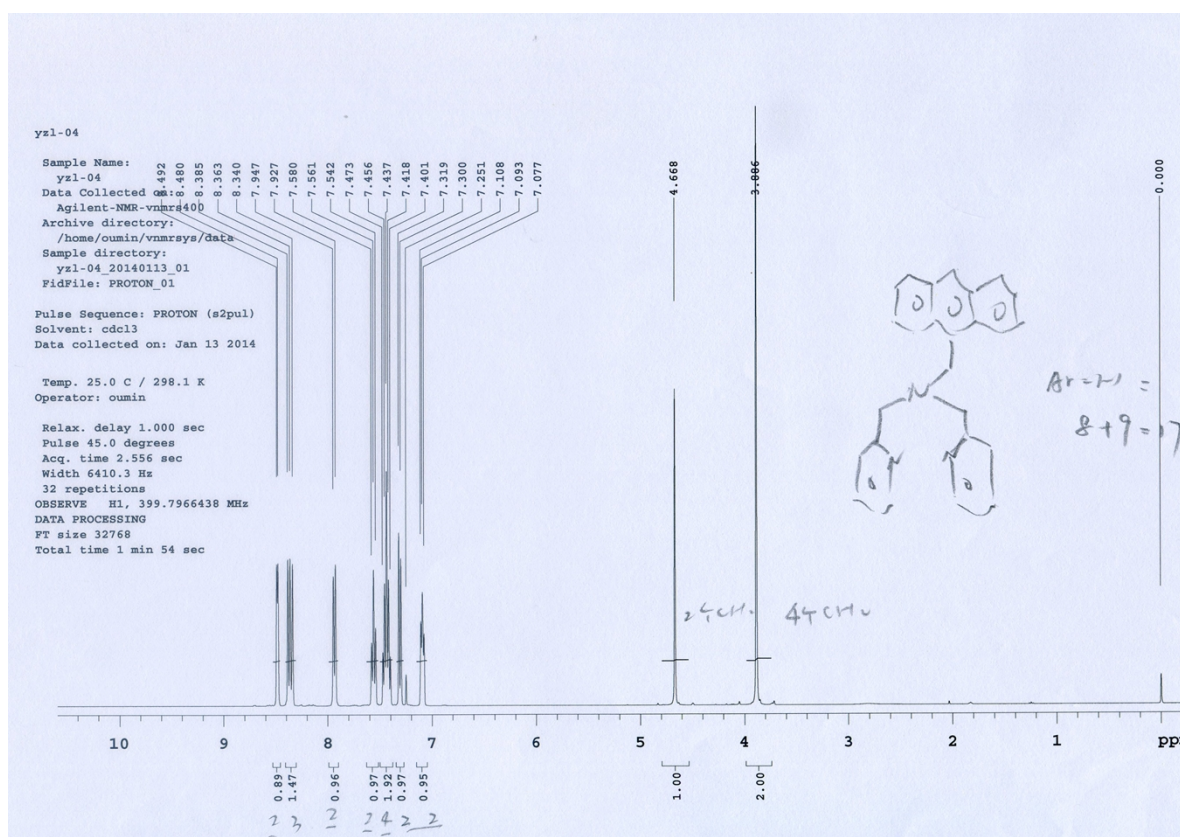Fig. S1  $^1\text{H}$  NMR of ADPA

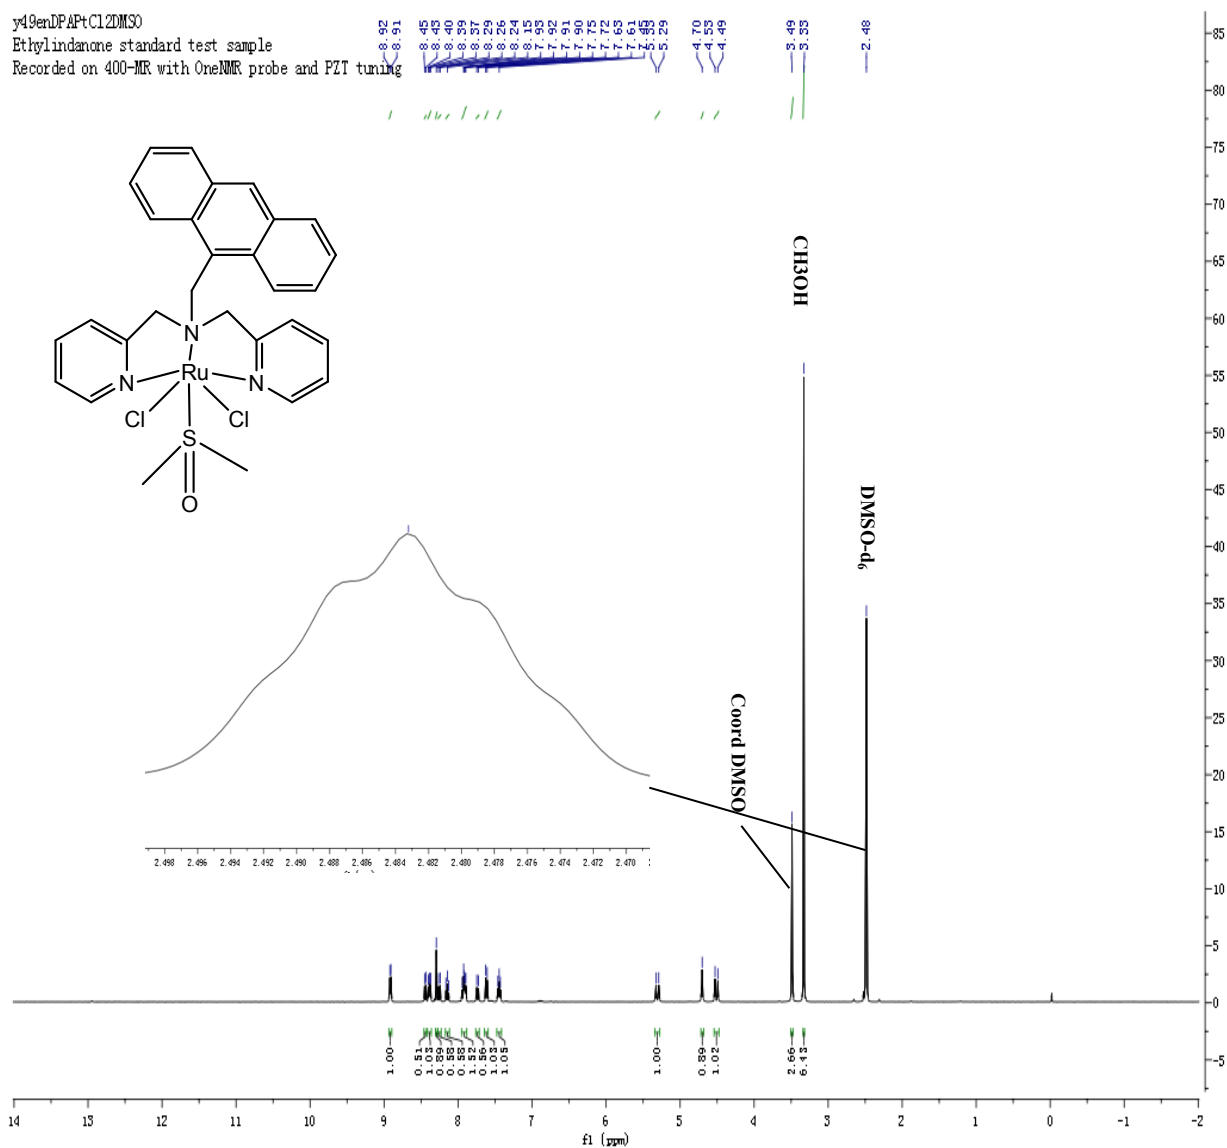

**Fig. S2**  $^1\text{H}$  NMR of compound 2 (Insert :magnify for DMSO-d<sub>6</sub> peak at 2.47 to 2.50 ppm. Non-coord DMSO peak has not been found at 2.52 ppm)

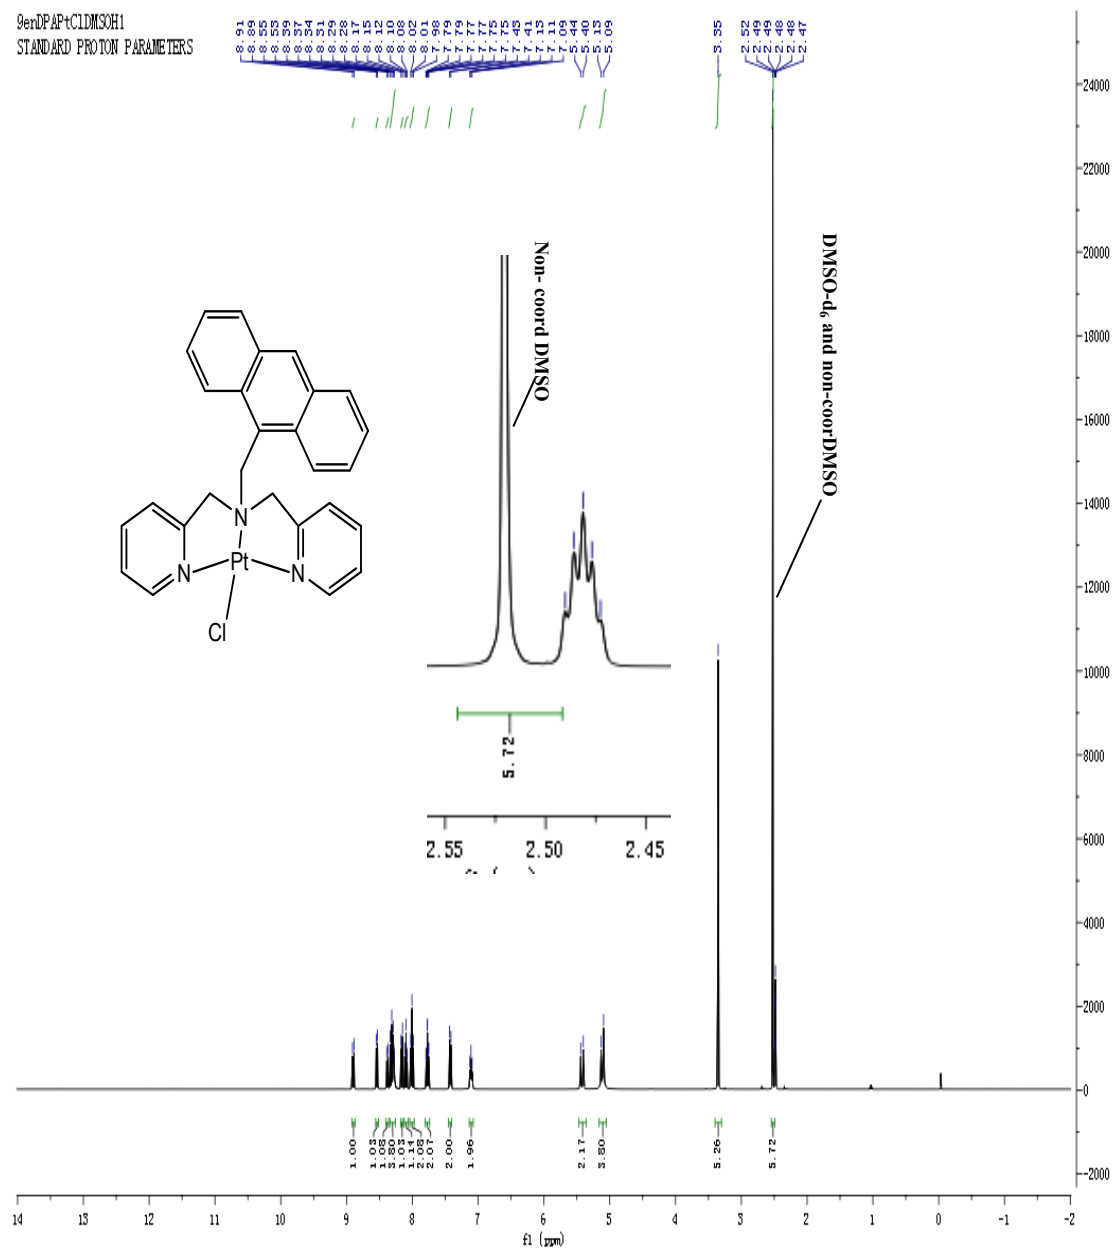

**Fig. S3** <sup>1</sup>H NMR of compound **3** (Insert :magnify for peak at 2.49 ppm. Non-coord DMSO peak has been found at 2.52 ppm)

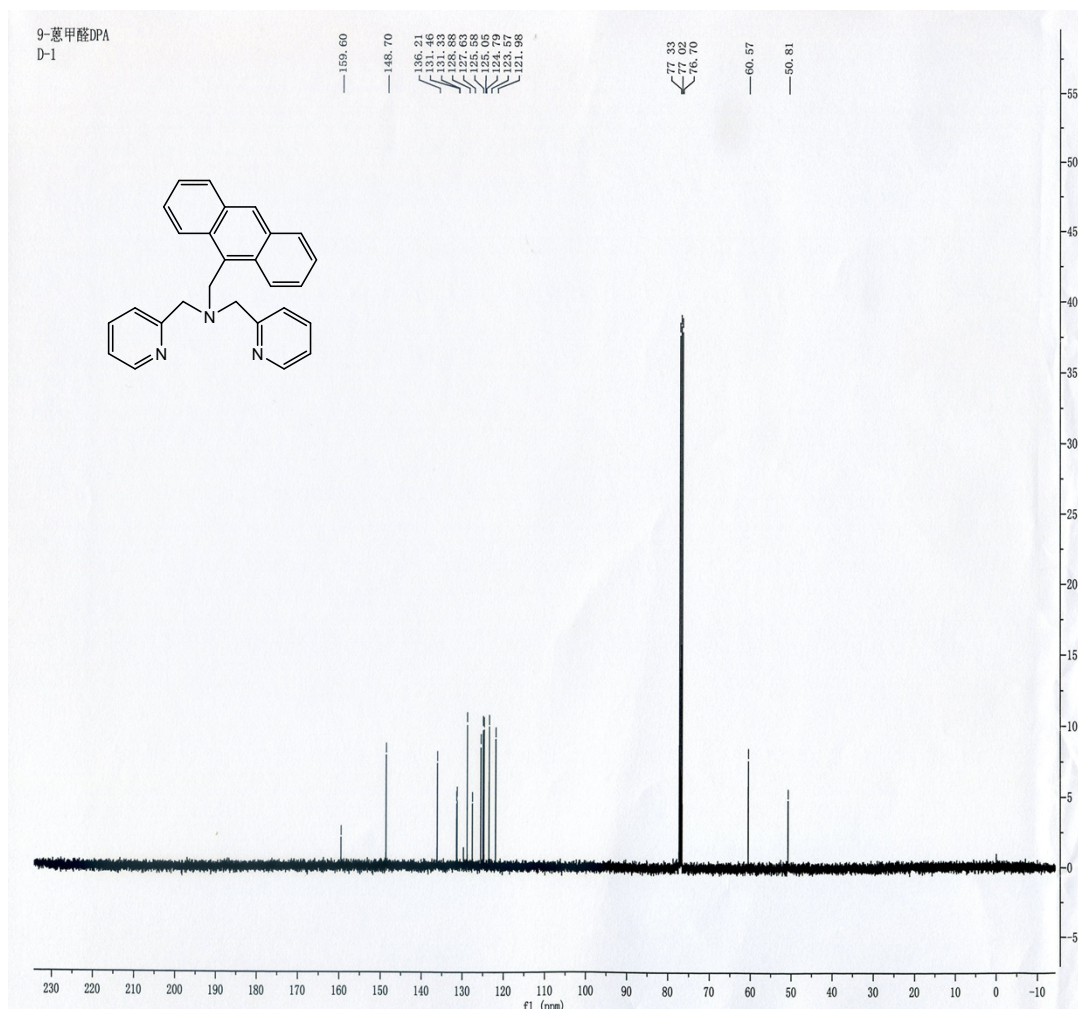**Fig. S4**  $^{13}\text{C}$  NMR of ADPA





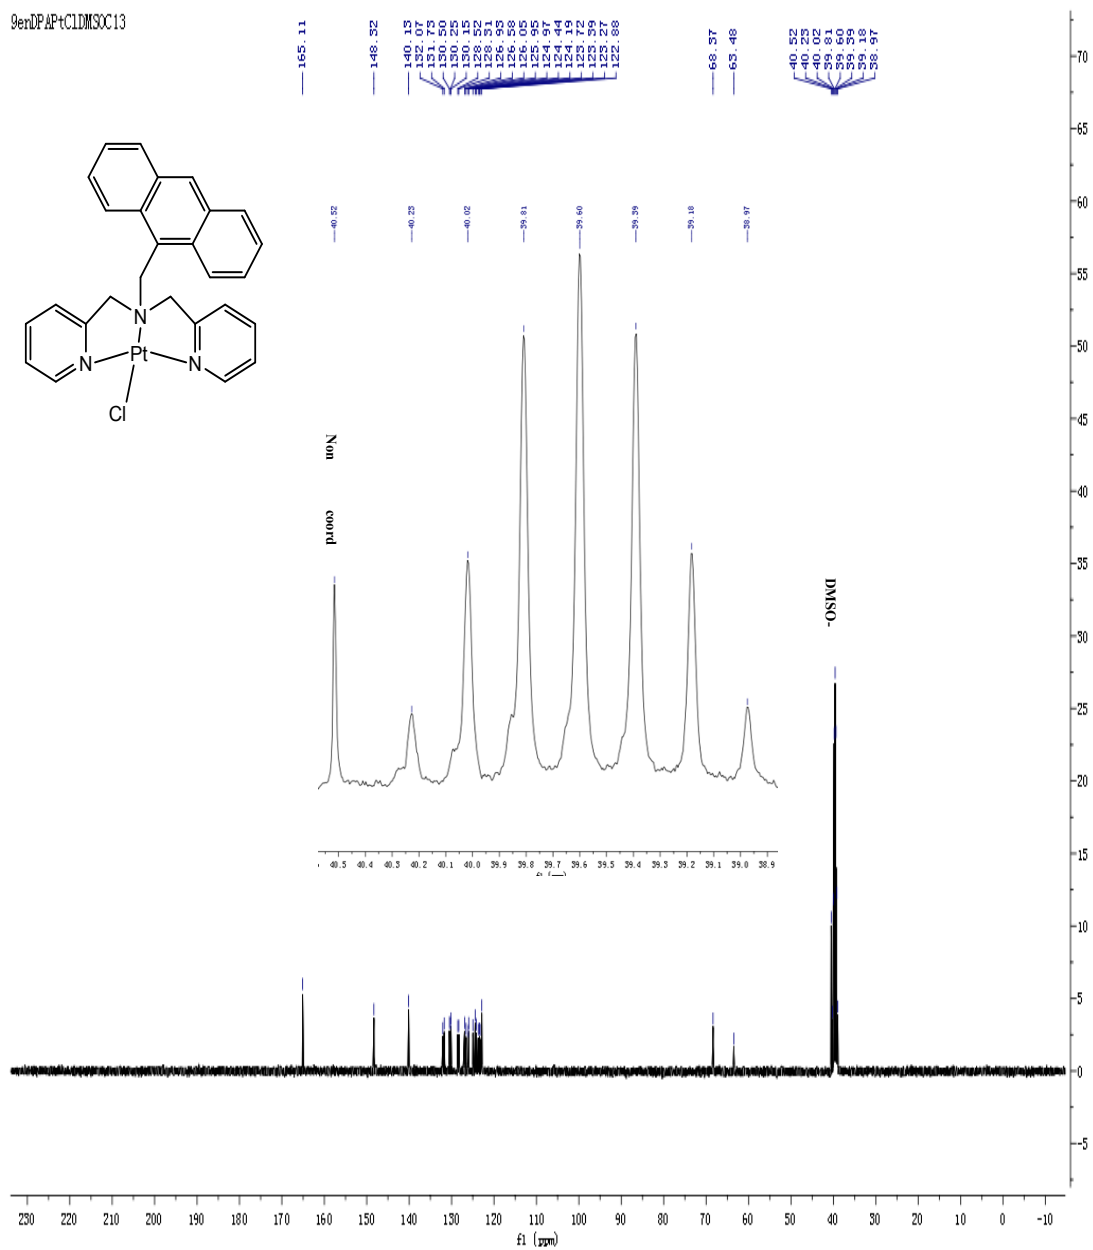

**Fig. S6**  $^{13}\text{C}$  NMR of compound **3** (Insert :magnify for peak at 39.0 to 41.0 ppm. Non- coord DMSO peak has been found at 40.52 ppm)

|                      |                                 |                   |                      |
|----------------------|---------------------------------|-------------------|----------------------|
| <b>Analysis Info</b> |                                 | Acquisition Date  | 6/18/2014 9:48:07 PM |
| Analysis Name        | D:\Data\Wenke Qi\yzl2-5000004.d | Operator          | BDAL@CN              |
| Method               | tune_low.m                      | Instrument / Ser# | microTOF-Q II 10410  |
| Sample Name          | yzl2-5                          |                   |                      |
| Comment              |                                 |                   |                      |

|                              |          |                       |           |                  |           |
|------------------------------|----------|-----------------------|-----------|------------------|-----------|
| <b>Acquisition Parameter</b> |          | Ion Polarity          | Positive  | Set Nebulizer    | 0.4 Bar   |
| Source Type                  | ESI      | Set Capillary         | 4500 V    | Set Dry Heater   | 180 °C    |
| Focus                        | Active   | Set End Plate Offset  | -500 V    | Set Dry Gas      | 4.0 l/min |
| Scan Begin                   | 50 m/z   | Set Collision Cell RF | 150.0 Vpp | Set Divert Valve | Source    |
| Scan End                     | 1000 m/z |                       |           |                  |           |

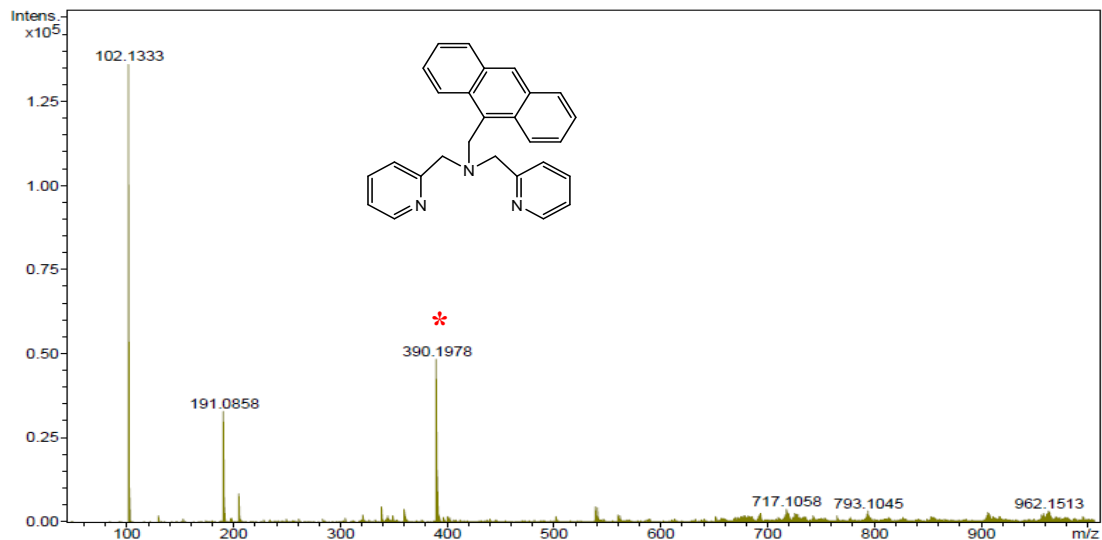

**Fig. S7** H RMS of ADPA .

The parent ion peaks at  $m/z$  390.1978 is marked with asterisks.

|                      |                                        |                   |                     |
|----------------------|----------------------------------------|-------------------|---------------------|
| <b>Analysis Info</b> |                                        | Acquisition Date  | 7/7/2014 3:15:41 PM |
| Analysis Name        | D:\Data\Wenke Qi\wenkle-YUAN-1000007.d | Operator          | BDAL@CN             |
| Method               | tune_low.m                             | Instrument / Ser# | microTOF-Q II 10410 |
| Sample Name          | wenkle-YUAN-1                          |                   |                     |
| Comment              |                                        |                   |                     |

|                              |          |                       |           |                  |           |
|------------------------------|----------|-----------------------|-----------|------------------|-----------|
| <b>Acquisition Parameter</b> |          | Ion Polarity          | Positive  | Set Nebulizer    | 0.4 Bar   |
| Source Type                  | ESI      | Set Capillary         | 4500 V    | Set Dry Heater   | 180 °C    |
| Focus                        | Active   | Set End Plate Offset  | -500 V    | Set Dry Gas      | 4.0 l/min |
| Scan Begin                   | 50 m/z   | Set Collision Cell RF | 150.0 Vpp | Set Divert Valve | Source    |
| Scan End                     | 1000 m/z |                       |           |                  |           |

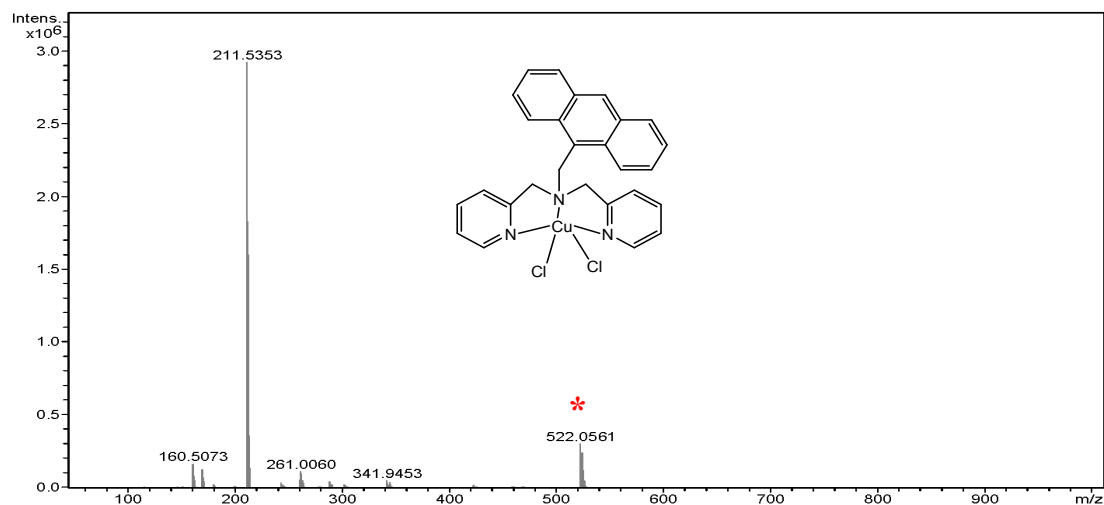

**Fig. S8** H RMS of compound 1 .

The parent ion peaks at  $m/z$  522.0561 is marked with asterisks.

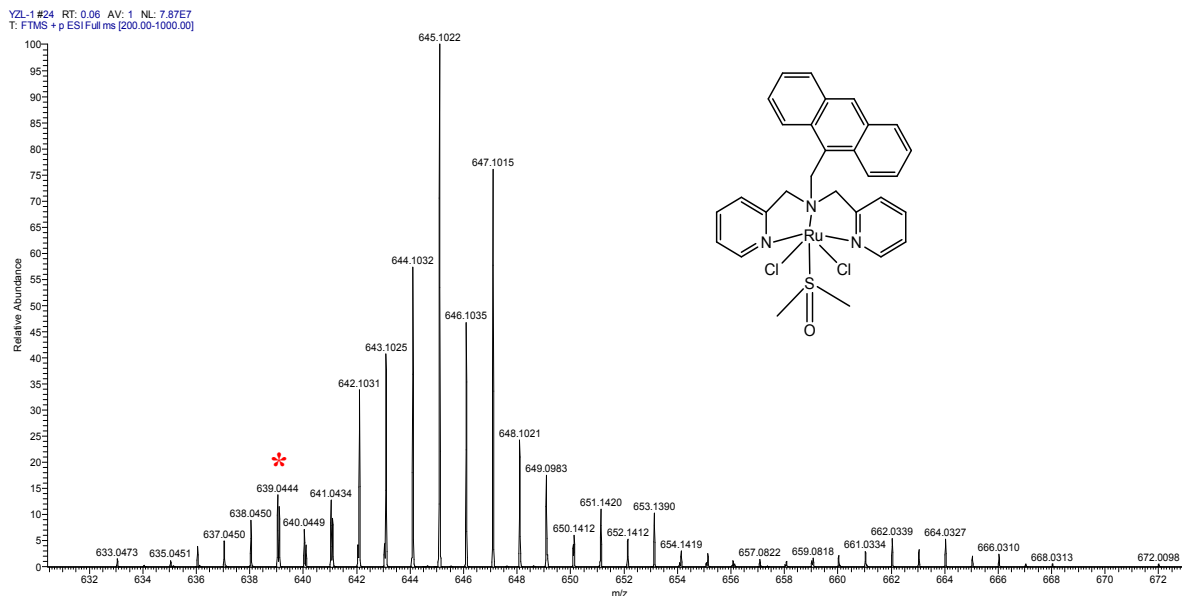

The cationic fragment peaks at m/z 639.0444 is marked with asterisks.

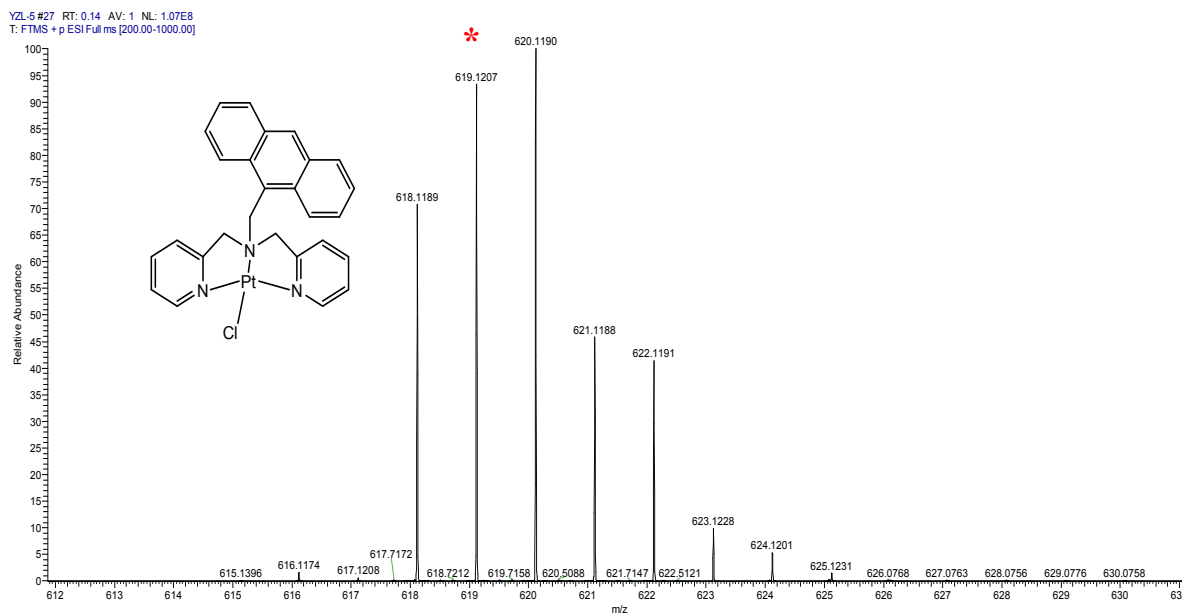

The cationic fragment peaks at m/z 619.1207 is marked with asterisks.



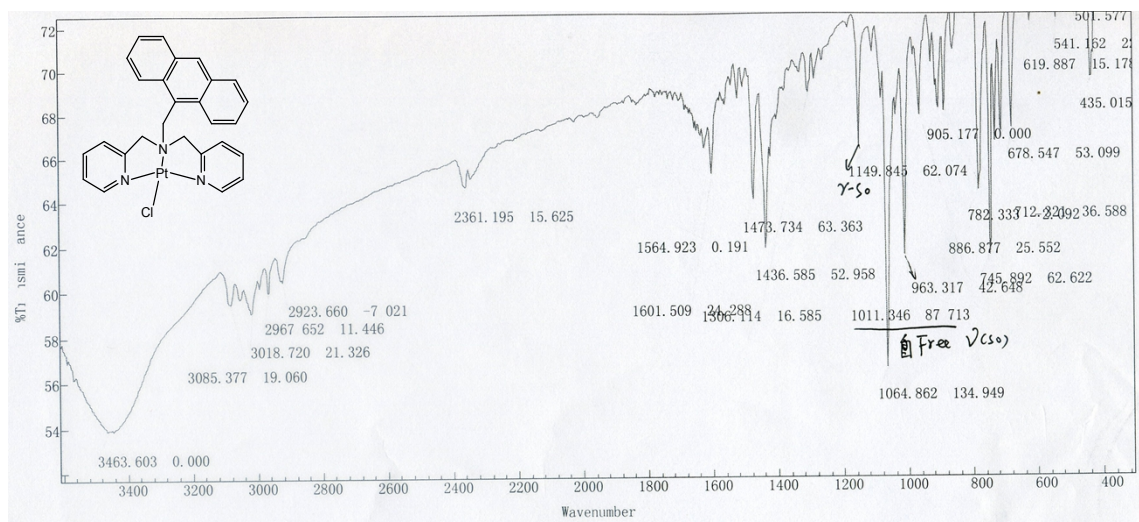

Fig. S14 FT-IR of compound 3

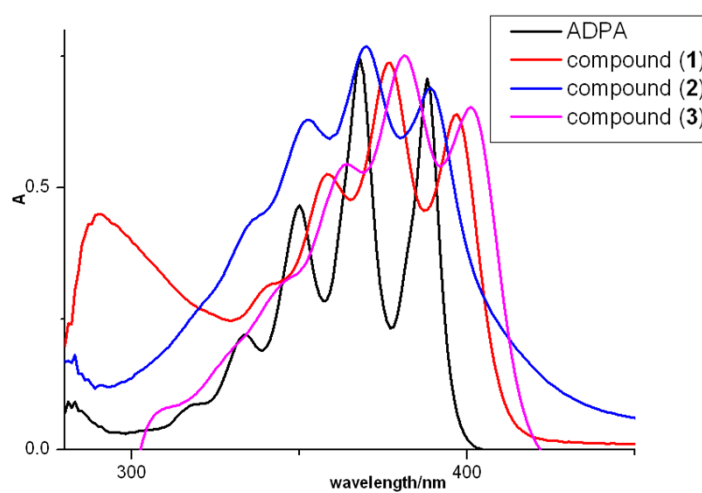

Fig. S15 UV-vis of liand(ADPA)and compounds 1-3

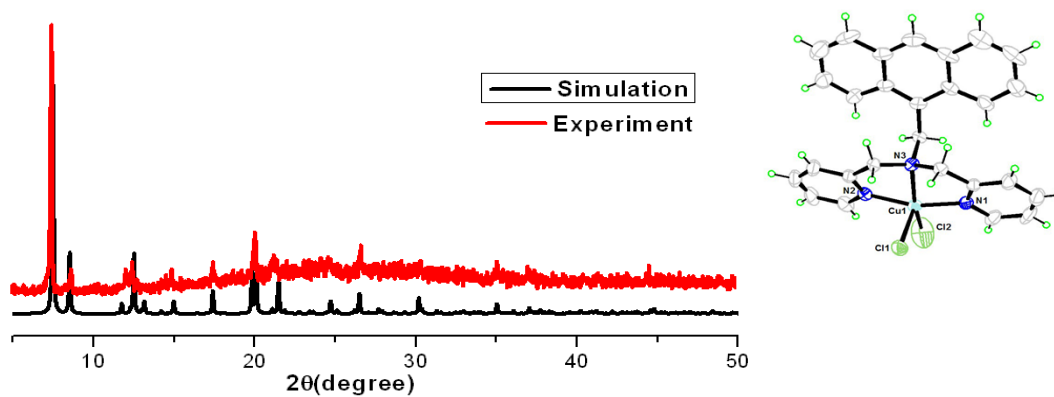

Fig. S16 The simulated and experimental PXRD patterns of compound 1

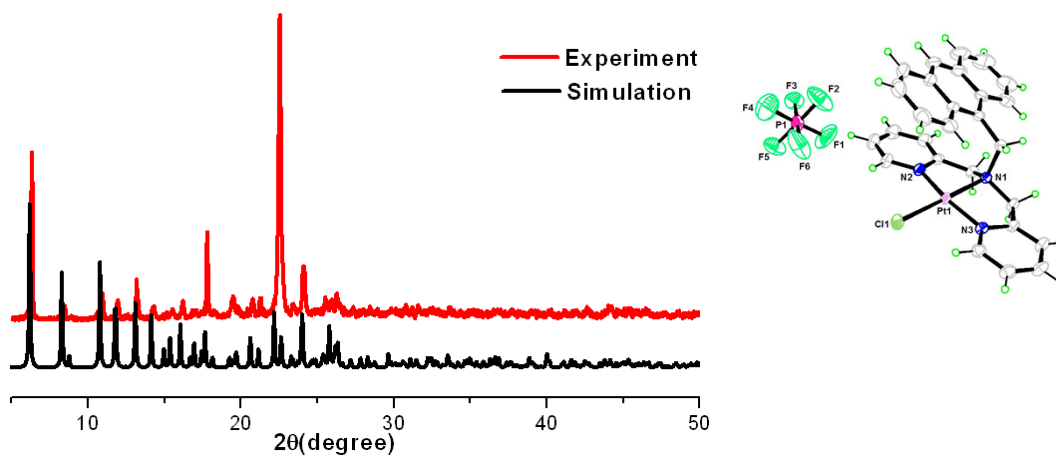

**Fig. S17** The simulated and experimental PXRD patterns of compound 3

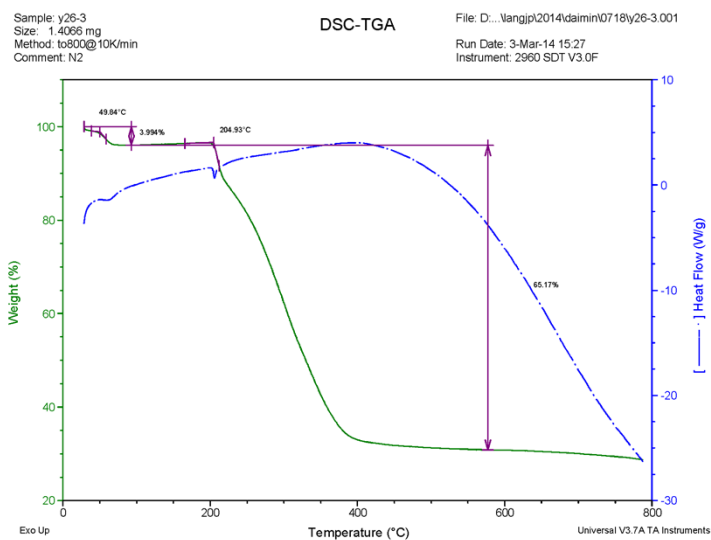

**Fig. S18** TG curves of compound 1

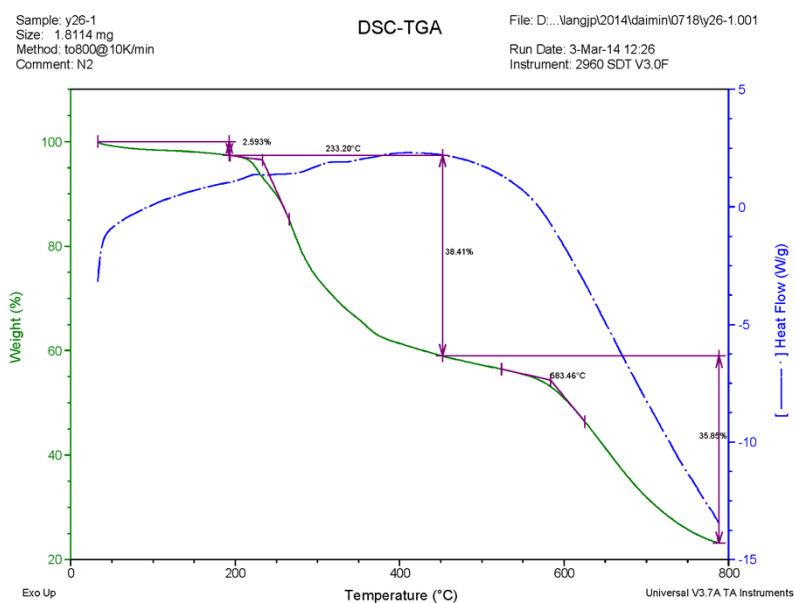

Fig. S19 TG curves of compound 2

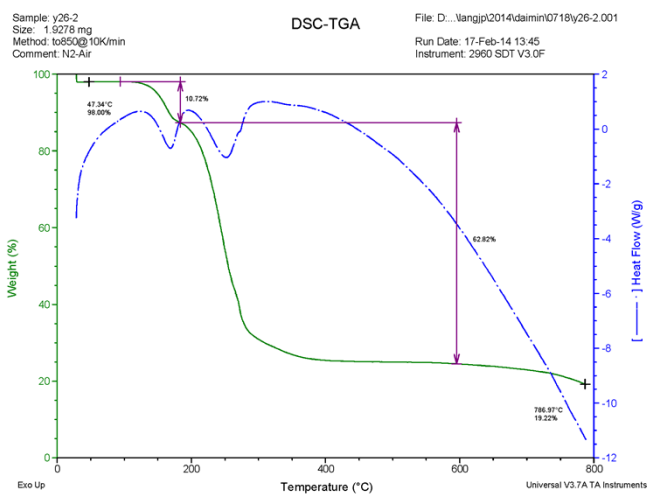

Fig. S20 TG curves of compound 3

**Table S1** Pertinent Crystal Data and Structure Refinement Results for Compounds **1–3**

| Compounds                                  | <b>1</b>                                                           | <b>2</b>                                                            | <b>3</b>                                                           |
|--------------------------------------------|--------------------------------------------------------------------|---------------------------------------------------------------------|--------------------------------------------------------------------|
| Formula                                    | CuC <sub>27</sub> N <sub>3</sub> H <sub>23</sub> Cl <sub>2</sub> O | C <sub>29</sub> H <sub>28</sub> ON <sub>3</sub> Cl <sub>2</sub> RuS | PtC <sub>27</sub> N <sub>3</sub> H <sub>23</sub> ClPF <sub>6</sub> |
| Mr                                         | 541.94                                                             | 639.58                                                              | 764.98                                                             |
| Space group                                | <i>Pna2(1)</i>                                                     | <i>R-3</i>                                                          | <i>P-1</i>                                                         |
| <i>a</i> (Å)                               | 20.6261(8)                                                         | 25.875(4)                                                           | 8.2692(3)                                                          |
| <i>b</i> (Å)                               | 14.7505(6)                                                         | 25.875(4)                                                           | 11.1553(4)                                                         |
| <i>c</i> (Å)                               | 8.7896(3)                                                          | 25.597(4)                                                           | 14.9524(6)                                                         |
| $\alpha$ (deg)                             | 90                                                                 | 90                                                                  | 72.155(1)                                                          |
| $\beta$ (deg)                              | 90                                                                 | 90                                                                  | 81.810(1)                                                          |
| $\gamma$ (deg)                             | 90                                                                 | 120                                                                 | 83.298(1)                                                          |
| <i>V</i> (Å <sup>3</sup> )                 | 2674.20(18)                                                        | 14842(6)                                                            | 1295.63(8)                                                         |
| <i>Z</i>                                   | 4                                                                  | 18                                                                  | 2                                                                  |
| <i>D<sub>c</sub></i> (g cm <sup>-3</sup> ) | 1.341                                                              | 1.288                                                               | 1.961                                                              |
| <i>M</i> (mm <sup>-1</sup> )               | 1.040                                                              | 0.724                                                               | 5.647                                                              |
| <i>F</i> (000)                             | 1116.0                                                             | 5868.0                                                              | 740.0                                                              |
| GOF                                        | 1.171                                                              | 1.014                                                               | 1.033                                                              |
| <i>R</i> <sub>1</sub> <sup>a</sup>         | 0.0392                                                             | 0.0450                                                              | 0.0257                                                             |
| <i>wR</i> <sub>2</sub> <sup>a</sup>        | 0.1438                                                             | 0.0987                                                              | 0.0676                                                             |

$$^a R_1 = \sum (||F_o| - |F_c||) / \sum |F_o|, wR = \{ \sum w[(F_o^2 - F_c^2)^2] / \sum w[(F_o^2)^2] \}^{1/2}$$



**Table S2.** Selected bond lengths (Å) and angles (°) for Compound 1

|             |            |             |          |
|-------------|------------|-------------|----------|
| Cu1—N1      | 2.005(3)   | C13—C14     | 1.419(5) |
| Cu1—N2      | 2.008(3)   | C13—C15     | 1.522(6) |
| Cu1—N3      | 2.091(3)   | C15—N3      | 1.509(5) |
| Cu1—Cl2     | 2.2572(13) | C16—C17     | 1.506(6) |
| Cu1—Cl1     | 2.4855(15) | C17—N1      | 1.332(6) |
| C1—N3       | 1.508(6)   | C17—C18     | 1.392(6) |
| C1—C2       | 1.354(6)   | C18—C19     | 1.408(8) |
| C1—C14      | 1.425(6)   | C19—C20     | 1.371(8) |
| C2—C3       | 1.408(9)   | C20—C21     | 1.368(7) |
| C3—C4       | 1.335(8)   | C21—N1      | 1.336(6) |
| C4—C5       | 1.429(7)   | C22—N3      | 1.479(5) |
| C5—C6       | 1.420(7)   | C22—C23     | 1.528(6) |
| C6—C7       | 1.377(6)   | C23—N2      | 1.333(6) |
| C7—C8       | 1.411(7)   | C23—C24     | 1.385(6) |
| C8—C9       | 1.357(8)   | C24—C25     | 1.383(8) |
| C7—C12      | 1.440(7)   | C25—C27     | 1.348(9) |
| C9—C10      | 1.417(9)   | C26—C27     | 1.366(8) |
| C10—C11     | 1.362(6)   | C26—N2      | 1.345(6) |
| C11—C12     | 1.420(6)   |             |          |
| C12—C13     | 1.423(5)   |             |          |
| N1—Cu1—N2   | 161.18(14) | C14—C13—C15 | 120.2(3) |
| N1—Cu1—N3   | 81.13(12)  | C12—C13—C15 | 120.3(3) |
| N2—Cu1—N3   | 80.93(13)  | N3—C15—C13  | 115.9(4) |
| N1—Cu1—Cl2  | 96.56(12)  | N3—C16—C17  | 109.5(4) |
| N2—Cu1—Cl2  | 97.41(12)  | C18—C17—C16 | 122.0(4) |
| N3—Cu1—Cl2  | 155.60(11) | C17—C18—C19 | 117.6(5) |
| N1—Cu1—Cl1  | 93.34(13)  | C20—C19—C18 | 119.5(4) |
| N2—Cu1—Cl1  | 94.00(13)  | C21—C20—C19 | 118.9(5) |
| N3—Cu1—Cl1  | 95.51(11)  | N1—C17—C18  | 121.9(4) |
| Cl2—Cu1—Cl1 | 108.89(7)  | N1—C17—C16  | 116.1(3) |
| C2—C1—C14   | 122.5(5)   | N1—C21—C20  | 122.5(5) |
| C1—C2—C3    | 120.6(5)   | C24—C23—C22 | 122.8(4) |
| C4—C3—C2    | 120.0(5)   | C25—C24—C23 | 118.0(5) |

|             |          |             |          |
|-------------|----------|-------------|----------|
| C3—C4—C5    | 121.2(5) | C27—C25—C24 | 120.5(5) |
| C6—C5—C14   | 118.6(4) | C25—C26—C27 | 119.7(6) |
| C6—C5—C4    | 121.6(5) | N2—C26—C27  | 122.1(5) |
| C14—C5—C4   | 119.8(5) | C17—N1—C21  | 119.6(4) |
| C7—C6—C5    | 121.9(5) | C17—N1—Cu1  | 113.5(3) |
| C6—C7—C12   | 119.8(4) | C21—N1—Cu1  | 126.9(3) |
| C8—C7—C12   | 120.4(4) | C23—N2—C26  | 119.0(4) |
| C6—C7—C8    | 119.8(5) | C23—N2—Cu1  | 113.7(3) |
| C9—C8—C7    | 120.5(5) | C26—N2—Cu1  | 127.2(3) |
| N3—C22—C23  | 109.2(3) | C16—N3—C15  | 113.6(3) |
| C1—C14—C5   | 115.7(4) | C22—N3—C15  | 113.8(3) |
| C8—C9—C10   | 120.0(5) | C16—N3—C11  | 104.2(2) |
| C11—C10—C9  | 120.7(5) | C22—N3—Cu1  | 104.2(2) |
| C13—C14—C1  | 124.3(4) | C15—N3—Cu1  | 107.4(3) |
| C13—C14—C5  | 120.1(4) | C1—N3—Cu1   | 107.1(3) |
| C11—C12—C13 | 123.6(4) |             |          |
| C11—C12—C7  | 116.7(4) |             |          |
| C13—C12—C7  | 119.7(4) |             |          |
| C14—C13—C12 | 119.5(4) |             |          |

**Table S3.** Selected bond lengths (Å) and angles (°) for Compound **2**

|         |            |          |          |
|---------|------------|----------|----------|
| Ru1—N3  | 2.077(3)   | C16—H16A | 0.9700   |
| Ru1—N2  | 2.097(3)   | C16—H16B | 0.9700   |
| Ru1—N1  | 2.142(3)   | C17—N2   | 1.349(5) |
| Ru1—S1  | 2.2284(12) | C17—C18  | 1.381(5) |
| Ru1—Cl2 | 2.4227(11) | C18—C19  | 1.380(6) |
| Ru1—Cl1 | 2.4350(11) | C18—H18A | 0.9300   |
| C1—C14  | 1.415(5)   | C19—C20  | 1.362(6) |
| C1—C2   | 1.419(6)   | C19—H19A | 0.9300   |
| C1—C6   | 1.437(6)   | C20—C21  | 1.374(6) |
| C2—C3   | 1.366(6)   | C20—H20A | 0.9300   |
| C2—H2A  | 0.9300     | C21—N2   | 1.338(5) |
| C3—C4   | 1.413(8)   | C21—H21A | 0.9300   |
| C3—H3A  | 0.9300     | C22—C23  | 1.479(5) |
| C4—C5   | 1.316(7)   | C22—N1   | 1.492(4) |
| C4—H4A  | 0.9300     | C22—H22A | 0.9700   |

|             |           |              |          |
|-------------|-----------|--------------|----------|
| C5—C6       | 1.416(6)  | C22—H22B     | 0.9700   |
| C5—H5A      | 0.9300    | C23—N3       | 1.355(5) |
| C6—C7       | 1.381(6)  | C23—C24      | 1.380(5) |
| C7—C8       | 1.378(6)  | C24—C25      | 1.374(6) |
| C7—H7A      | 0.9300    | C24—H24A     | 0.9300   |
| C8—C13      | 1.428(6)  | C25—C26      | 1.373(6) |
| C8—C9       | 1.444(6)  | C25—H25A     | 0.9300   |
| C9—C10      | 1.340(7)  | C26—C27      | 1.360(6) |
| C9—H9A      | 0.9300    | C26—H26A     | 0.9300   |
| C10—C11     | 1.394(7)  | C27—N3       | 1.347(5) |
| C10—H10A    | 0.9300    | C27—H27A     | 0.9300   |
| C11—C12     | 1.344(6)  | C28—S1       | 1.783(4) |
| C11—H11A    | 0.9300    | C28—H28A     | 0.9600   |
| C12—C13     | 1.441(6)  | C28—H28B     | 0.9600   |
| C12—H12A    | 0.9300    | C28—H28C     | 0.9600   |
| C13—C14     | 1.406(5)  | C29—S1       | 1.785(5) |
| C14—C15     | 1.534(5)  | C29—H29A     | 0.9600   |
| C15—N1      | 1.511(4)  | C29—H29B     | 0.9600   |
| C15—H15A    | 0.9500    | C29—H29C     | 0.9600   |
| C16—C17     | 1.47 (5)  | O1—S1        | 1.483(3) |
| C16—N1      | 1.507(4)  |              |          |
| N3—Ru1—N2   | 95.11(12) | N2—C17—C18   | 121.7(4) |
| N3—Ru1—N1   | 78.25(12) | N2—C17—C16   | 114.7(3) |
| N2—Ru1—N1   | 80.83(11) | C18—C17—C16  | 123.5(4) |
| N3—Ru1—S1   | 91.64(9)  | C17—C18—C19  | 119.2(4) |
| N2—Ru1—S1   | 172.94(9) | C17—C18—H18A | 120.4    |
| N1—Ru1—S1   | 98.55(8)  | C19—C18—H18A | 120.4    |
| N3—Ru1—Cl2  | 93.84(9)  | C20—C19—C18  | 119.1(4) |
| N2—Ru1—Cl2  | 93.32(9)  | C20—C19—H19A | 120.4    |
| N1—Ru1—Cl2  | 169.61(8) | C18—C19—H19A | 120.4    |
| S1—Ru1—Cl2  | 88.30(4)  | C21—C20—C19  | 119.1(4) |
| N3—Ru1—Cl1  | 174.73(9) | C21—C20—H20A | 120.84   |
| N2—Ru1—Cl1  | 83.03(9)  | C19—C20—H20A | 120.4    |
| N1—Ru1—Cl1  | 96.57(8)  | N2—C21—C20   | 122.8(4) |
| S1—Ru1—Cl1  | 90.07(4)  | N2—C21—H21A  | 118.6    |
| Cl2—Ru1—Cl1 | 91.19(4)  | C20—C21—H21A | 118.6    |
| C14—C1—C2   | 123.9(4)  | C23—C22—N1   | 109.6(3) |
| C14—C1—C6   | 119.3(4)  | C23—C22—H22A | 109.7    |
| C2—C1—C6    | 116.8(4)  | N1—C22—H22A  | 109.7    |

|              |          |               |          |
|--------------|----------|---------------|----------|
| C3—C2—C1     | 121.6(5) | C23—C22—H22B  | 109.7    |
| C3—C2—H2A    | 119.2    | N1—C22—H22B   | 109.7    |
| C1—C2—H2A    | 119.2    | H22A—C22—H22B | 108.2    |
| C2—C3—C4     | 120.3(5) | N3—C23—C24    | 121.0(4) |
| C2—C3—H3A    | 119.9    | N3—C23—C22    | 115.6(3) |
| C4—C3—H3A    | 119.9    | C24—C23—C22   | 123.4(4) |
| C5—C4—C3     | 120.0(5) | C23—C24—C25   | 119.1(4) |
| C5—C4—H4A    | 120.0    | C23—C24—H24A  | 120.4    |
| C3—C4—H4A    | 120.0    | C25—C24—H24A  | 120.4    |
| C4—C5—C6     | 122.6(5) | C26—C25—C24   | 119.5(4) |
| C4—C5—H5A    | 118.7    | C26—C25—H25A  | 120.3    |
| C6—C5—H5A    | 118.7    | C24—C25—H25A  | 120.3    |
| C7—C6—C5     | 122.5(5) | C25—C26—C27   | 119.5(4) |
| C7—C6—C1     | 118.6(4) | C25—C26—H26A  | 120.2    |
| C5—C6—C1     | 118.8(5) | C27—C26—H26A  | 120.2    |
| C8—C7—C6     | 123.1(4) | N3—C27—C26    | 121.8(4) |
| C6—C7—H7A    | 118.4    | N3—C27—H27A   | 119.1    |
| C8—C7—H7A    | 118.4    | C26—C27—H27A  | 119.1    |
| C7—C8—C13    | 119.1(4) | S1—C28—H28A   | 109.5    |
| C7—C8—C9     | 121.6(5) | S1—C28—H28B   | 109.5    |
| C13—C8—C9    | 119.1(5) | H28A—C28—H28B | 109.5    |
| C10—C9—C8    | 120.3(5) | S1—C28—H28C   | 109.5    |
| C10—C9—H9A   | 119.9    | H28A—C28—H28C | 109.5    |
| C8—C9—H9A    | 119.9    | H28B—C28—H28C | 109.5    |
| C9—C10—C11   | 121.2(5) | S1—C29—H29A   | 109.5    |
| C9—C10—H10A  | 119.4    | S1—C29—H29B   | 109.5    |
| C11—C10—H10A | 119.4    | H29A—C29—H29B | 109.5    |
| C12—C11—C10  | 121.0(5) | S1—C29—H29C   | 109.5    |
| C12—C11—H11A | 119.5    | H29A—C29—H29C | 109.5    |
| C10—C11—H11A | 119.5    | H29B—C29—H29C | 109.5    |
| C11—C12—C13  | 121.6(4) | C22—N1—C15    | 112.9(3) |
| C11—C12—H12A | 119.2    | C22—N1—C16    | 106.9(3) |
| C13—C12—H12A | 119.2    | C15—N1—C16    | 113 (3)  |
| C14—C13—C8   | 119.4(4) | C22—N1—Ru1    | 104.8(2) |

|                 |           |                |            |
|-----------------|-----------|----------------|------------|
| C14—C13—C12     | 123.8(4)  | C15—N1—Ru1     | 112.4(2)   |
| C8—C13—C12      | 116.7(4)  | C16—N1—Ru1     | 106.8(2)   |
| C1—C14—C13      | 120.2(4)  | C17—N2—C21     | 124.9(3)   |
| C1—C14—C15      | 119.6(4)  | C17—N2—Ru1     | 115 (3)    |
| C13—C14—C15     | 119.7(3)  | C21—N2—Ru1     | 125 (3)    |
| N1—C15—C14      | 116.7(3)  | C27—N3—C23     | 119.0(3)   |
| N1—C15—H15A     | 108.1     | C27—N3—Ru1     | 126.5(3)   |
| C14—C15—H15A    | 108.1     | C23—N3—Ru1     | 114.4(3)   |
| C17—C16—N1      | 112.4(3)  | C28—S1—C29     | 29 98.2(2) |
| C17—C16—H16A    | 109.1     | C28—S1—O1      | 106.0(2)   |
| N1—C16—H16A     | 109.1     | C29—S1—O1      | 105.4(2)   |
| C17—C16—H16B    | 109.1     | C28—S1—Ru1     | 112.25(17) |
| N1—C16—H16B     | 109.1     | C29—S1—Ru1     | 112.39(17) |
| H16A—C16—H16B   | 107.9     | O1—S1—Ru1      | 120.13(12) |
|                 |           |                |            |
| C14—C1—C2—C3    | 178.3(4)  | S1—Ru1—N1—C22  | 56.1(2)    |
| C6—C1—C2—C3     | 0.4(6)    | C12—Ru1—N1—C22 | -74.8(5)   |
| C1—C2—C3—C4     | -0.1(7)   | C11—Ru1—N1—C22 | 147.1(2)   |
| C2—C3—C4—C5     | -0.1(8)   | N3—Ru1—N1—C15  | -156.8(2)  |
| C3—C4—C5—C6     | 0.1(9)    | N2—Ru1—N1—C15  | 106.0(2)   |
| C4—C5—C6—C7     | -176.8(5) | S1—Ru1—N1—C15  | -66.9(2)   |
| C4—C5—C6—C1     | 0.2(8)    | C12—Ru1—N1—C15 | 162.3(3)   |
| C14—C1—C6—C7    | -1.3(6)   | C11—Ru1—N1—C15 | 24.2(2)    |
| C2—C1—C6—C7     | 176.7(4)  | N3—Ru1—N1—C16  | 79.3(2)    |
| C14—C1—C6—C5    | -178.4(4) | N2—Ru1—N1—C16  | -17.9(2)   |
| C2—C1—C6—C5     | -0.4(6)   | S1—Ru1—N1—C16  | 169.23(19) |
| C5—C6—C7—C8     | 176.1(4)  | C12—Ru1—N1—C16 | 38.4(6)    |
| C1—C6—C7—C8     | -1.0(7)   | C11—Ru1—N1—C16 | -99.7(2)   |
| C6—C7—C8—C13    | -0.1(7)   | C18—C17—N2—C21 | 0.1(6)     |
| C6—C7—C8—C9     | -176.3(4) | C16—C17—N2—C21 | -177.2(3)  |
| C7—C8—C9—C10    | 175.4(5)  | C18—C17—N2—Ru1 | -164.1(3)  |
| C13—C8—C9—C10   | -0.8(7)   | C16—C17—N2—Ru1 | 18.6(4)    |
| C8—C9—C10—C11   | -1.1(8)   | C20—C21—N2—C17 | 0.3(6)     |
| C9—C10—C11—C12  | 1.0(8)    | C20—C21—N2—Ru1 | 162.7(3)   |
| C10—C11—C12—C13 | 1.0(7)    | N3—Ru1—N2—C17  | -76.9(3)   |
| C7—C8—C13—C14   | 3.5(6)    | N1—Ru1—N2—C17  | 0.3(3)     |
| C9—C8—C13—C14   | 179.8(4)  | S1—Ru1—N2—C17  | 85.8(8)    |

|                 |           |                |             |
|-----------------|-----------|----------------|-------------|
| C7—C8—C13—C12   | -173.7(4) | C12—Ru1—N2—C17 | -171.1(3)   |
| C9—C8—C13—C12   | 2.6(6)    | C11—Ru1—N2—C17 | 98.1(3)     |
| C11—C12—C13—C14 | -179.8(4) | N3—Ru1—N2—C21  | 120.2(3)    |
| C11—C12—C13—C8  | -2.7(6)   | N1—Ru1—N2—C21  | -162.6(3)   |
| C2—C1—C14—C13   | -173.2(4) | S1—Ru1—N2—C21  | -77.1(8)    |
| C6—C1—C14—C13   | 4.7(6)    | C12—Ru1—N2—C21 | 26.0(3)     |
| C2—C1—C14—C15   | -0.9(6)   | C11—Ru1—N2—C21 | -64.8(3)    |
| C6—C1—C14—C15   | 177.0(3)  | C26—C27—N3—C23 | 1.5(6)      |
| C8—C13—C14—C1   | -5.8(6)   | C26—C27—N3—Ru1 | -178.1(3)   |
| C12—C13—C14—C1  | 171.2(4)  | C24—C23—N3—C27 | -0.6(6)     |
| C8—C13—C14—C15  | -178.1(3) | C22—C23—N3—C27 | -179.4(4)   |
| C12—C13—C14—C15 | -1.0(6)   | C24—C23—N3—Ru1 | 179.0(3)    |
| C1—C14—C15—N1   | 95.2(4)   | C22—C23—N3—Ru1 | 0.2(4)      |
| C13—C14—C15—N1  | -92.5(4)  | N2—Ru1—N3—C27  | -81.2(4)    |
| N1—C16—C17—N2   | -35.2(5)  | N1—Ru1—N3—C27  | -160.7(4)   |
| N1—C16—C17—C18  | 147.6(4)  | S1—Ru1—N3—C27  | 100.9(3)    |
| N2—C17—C18—C19  | -0.1(7)   | C12—Ru1—N3—C27 | 12.5(3)     |
| C16—C17—C18—C19 | 176.9(4)  | C11—Ru1—N3—C27 | -150.2(8)   |
| C17—C18—C19—C20 | -0.2(7)   | N2—Ru1—N3—C23  | 99.2(3)     |
| C18—C19—C20—C21 | 0.5(8)    | N1—Ru1—N3—C23  | 19.7(3)     |
| C19—C20—C21—N2  | -0.6(7)   | S1—Ru1—N3—C23  | -78.7(3)    |
| N1—C22—C23—N3   | -30.6(5)  | C12—Ru1—N3—C23 | -167.1(3)   |
| N1—C22—C23—C24  | 150.6(4)  | C11—Ru1—N3—C23 | 30.2(12)    |
| N3—C23—C24—C25  | -1.3(6)   | N3—Ru1—S1—C28  | -36.2(2)    |
| C22—C23—C24—C25 | 177.4(4)  | N2—Ru1—S1—C28  | 161.0(7)    |
| C23—C24—C25—C26 | 2.3(7)    | N1—Ru1—S1—C28  | -114.6(2)   |
| C24—C25—C26—C27 | -1.5(7)   | C12—Ru1—S1—C28 | 57.60(18)   |
| C25—C26—C27—N3  | -0.4(7)   | C11—Ru1—S1—C28 | 148.80(18)  |
| C23—C22—N1—C15  | 166.2(3)  | N3—Ru1—S1—C29  | -145.8(2)   |
| C23—C22—N1—C16  | -69.5(4)  | N2—Ru1—S1—C29  | 51.4(8)     |
| C23—C22—N1—Ru1  | 43.6(3)   | N1—Ru1—S1—C29  | 135.9(2)    |
| C14—C15—N1—C22  | 58.2(4)   | C12—Ru1—S1—C29 | -52.0(2)    |
| C14—C15—N1—C16  | -63.0(4)  | C11—Ru1—S1—C29 | 39.2(2)     |
| C14—C15—N1—Ru1  | 176.4(3)  | N3—Ru1—S1—O1   | 89.39(18)   |
| C17—C16—N1—C22  | 144.4(3)  | N2—Ru1—S1—O1   | -73.4(7)    |
| C17—C16—N1—C15  | -91.1(3)  | N1—Ru1—S1—O1   | 11.02(17)   |
| C17—C16—N1—Ru1  | 32.7(3)   | C12—Ru1—S1—O1  | -176.82(15) |

**Table S2.** Selected bond lengths (Å) and angles (°) for Compound 3

|          |            |          |            |
|----------|------------|----------|------------|
| Pt1—N2   | 2.003 (3)  | C26—C25  | 1.385 (5)  |
| Pt1—N3   | 2.007 (3)  | C26—C27  | 1.506 (5)  |
| Pt1—N1   | 2.035 (3)  | C15—H15A | 0.9900     |
| Pt1—Cl1  | 2.3065 (9) | C15—H15B | 0.9900     |
| N1—C21   | 1.506 (4)  | C4—C5    | 1.337 (10) |
| N1—C27   | 1.506 (4)  | C4—H4A   | 0.9500     |
| N1—C15   | 1.527 (4)  | C27—H27A | 0.9900     |
| N3—C16   | 1.340 (5)  | C27—H27B | 0.9900     |
| N3—C20   | 1.354 (4)  | C13—C8   | 1.415 (6)  |
| N2—C26   | 1.343 (5)  | C18—C17  | 1.370 (6)  |
| N2—C22   | 1.355 (5)  | C18—C19  | 1.381 (6)  |
| C3—C2    | 1.365 (7)  | C18—H18A | 0.9500     |
| C3—C4    | 1.404 (10) | C21—H21A | 0.9900     |
| C3—H3A   | 0.9500     | C21—H21B | 0.9900     |
| C11—C12  | 1.346 (7)  | C25—C24  | 1.366 (7)  |
| C11—C10  | 1.394 (11) | C25—H25A | 0.9500     |
| C11—H11A | 0.9500     | C19—H19A | 0.9500     |
| C9—C10   | 1.363 (11) | C16—C17  | 1.375 (6)  |
| C9—C8    | 1.440 (8)  | C16—H16A | 0.9500     |
| C9—H9A   | 0.9500     | C17—H17A | 0.9500     |
| C10—H10A | 0.9500     | C6—C7    | 1.388 (8)  |
| C12—C13  | 1.447 (7)  | C6—C5    | 1.429 (8)  |
| C12—H12A | 0.9500     | C8—C7    | 1.399 (8)  |
| C2—C1    | 1.426 (6)  | C7—H7A   | 0.9500     |
| C2—H2A   | 0.9500     | C22—H22A | 0.9500     |
| C23—C22  | 1.366 (6)  | C24—H24A | 0.9500     |
| C23—C24  | 1.385 (8)  | C5—H5A   | 0.9500     |
| C23—H23A | 0.9500     | P1—F1    | 1.501 (4)  |
| C20—C19  | 1.377 (5)  | P1—F6    | 1.549 (4)  |
| C20—C21  | 1.508 (5)  | P1—F2    | 1.564 (5)  |
| C14—C13  | 1.412 (5)  | P1—F4    | 1.569 (5)  |
| C14—C1   | 1.417 (5)  | P1—F5    | 1.580 (4)  |
| C14—C15  | 1.498 (5)  | P1—F3    | 1.574 (3)  |
| C1—C6    | 1.438 (6)  |          |            |

|              |             |               |           |
|--------------|-------------|---------------|-----------|
| N2—Pt1—N3    | 167.04 (12) | N1—C27—H27A   | 109.7     |
| N2—Pt1—N1    | 83.87 (12)  | C26—C27—H27B  | 109.7     |
| N3—Pt1—N1    | 84.48 (11)  | N1—C27—H27B   | 109.7     |
| N2—Pt1—Cl1   | 95.41 (9)   | H27A—C27—H27B | 108.2     |
| N3—Pt1—Cl1   | 96.30 (9)   | C8—C13—C14    | 120.1 (4) |
| N1—Pt1—Cl1   | 179.03 (8)  | C8—C13—C12    | 115.9 (4) |
| C21—N1—C27   | 112.2 (3)   | C14—C13—C12   | 124.0 (4) |
| C21—N1—C15   | 108.5 (3)   | C17—C18—C19   | 119.2 (4) |
| C27—N1—C15   | 112.3 (3)   | C17—C18—H18A  | 120.4     |
| C21—N1—Pt1   | 105.4 (2)   | C19—C18—H18A  | 120.4     |
| C27—N1—Pt1   | 103.7 (2)   | N1—C21—C20    | 110.7 (3) |
| C15—N1—Pt1   | 114.5 (2)   | N1—C21—H21A   | 109.5     |
| C16—N3—C20   | 118.9 (3)   | C20—C21—H21A  | 109.5     |
| C16—N3—Pt1   | 128.6 (2)   | N1—C21—H21B   | 109.5     |
| C20—N3—Pt1   | 112.5 (2)   | C20—C21—H21B  | 109.5     |
| C26—N2—C22   | 119.7 (3)   | H21A—C21—H21B | 108.1     |
| C26—N2—Pt1   | 112.5 (2)   | C24—C25—C26   | 119.1 (4) |
| C22—N2—Pt1   | 127.8 (3)   | C24—C25—H25A  | 120.5     |
| C2—C3—C4     | 121.0 (6)   | C26—C25—H25A  | 120.5     |
| C2—C3—H3A    | 119.5       | C20—C19—C18   | 119.4 (4) |
| C4—C3—H3A    | 119.5       | C20—C19—H19A  | 120.3     |
| C12—C11—C10  | 120.3 (7)   | C18—C19—H19A  | 120.3     |
| C12—C11—H11A | 119.9       | N3—C16—C17    | 122.2 (4) |
| C10—C11—H11A | 119.9       | N3—C16—H16A   | 118.9     |
| C10—C9—C8    | 119.3 (6)   | C17—C16—H16A  | 118.9     |
| C10—C9—H9A   | 120.4       | C18—C17—C16   | 119.2 (4) |
| C8—C9—H9A    | 120.4       | C18—C17—H17A  | 120.4     |
| C9—C10—C11   | 121.3 (6)   | C16—C17—H17A  | 120.4     |
| C9—C10—H10A  | 119.4       | C7—C6—C1      | 119.6 (5) |
| C11—C10—H10A | 119.4       | C7—C6—C5      | 122.4 (5) |
| C11—C12—C13  | 122.5 (6)   | C1—C6—C5      | 118.0 (5) |
| C11—C12—H12A | 118.7       | C7—C8—C13     | 118.9 (4) |
| C13—C12—H12A | 118.7       | C7—C8—C9      | 120.5 (5) |
| C3—C2—C1     | 120.9 (5)   | C13—C8—C9     | 120.6 (6) |
| C3—C2—H2A    | 119.5       | C8—C7—C6      | 122.1 (4) |
| C1—C2—H2A    | 119.5       | C8—C7—H7A     | 119.0     |



|                |            |                 |           |
|----------------|------------|-----------------|-----------|
| C22—C23—H23A   | 120.5      | N2—C22—C23      | 121.3 (4) |
| C24—C23—H23A   | 120.5      | N2—C22—H22A     | 119.3     |
| N3—C20—C19     | 121.1 (3)  | C23—C22—H22A    | 119.3     |
| N3—C20—C21     | 116.1 (3)  | C25—C24—C23     | 119.9 (4) |
| C19—C20—C21    | 122.5 (3)  | C25—C24—H24A    | 120.0     |
| C13—C14—C1     | 120.5 (4)  | C23—C24—H24A    | 120.0     |
| C13—C14—C15    | 119.6 (3)  | C4—C5—C6        | 122.2 (5) |
| C1—C14—C15     | 119.9 (3)  | C4—C5—H5A       | 118.9     |
| C6—C1—C14      | 118.5 (4)  | C6—C5—H5A       | 118.9     |
| C6—C1—C2       | 117.9 (4)  | F1—P1—F6        | 93.8 (4)  |
| C14—C1—C2      | 123.6 (4)  | F1—P1—F2        | 87.2 (5)  |
| N2—C26—C25     | 121.0 (4)  | F6—P1—F2        | 90.2 (3)  |
| N2—C26—C27     | 115.5 (3)  | F1—P1—F4        | 177.6 (4) |
| C25—C26—C27    | 123.3 (4)  | F6—P1—F4        | 88.6 (4)  |
| C14—C15—N1     | 114.6 (3)  | F2—P1—F4        | 92.1 (4)  |
| C14—C15—H15A   | 108.6      | F1—P1—F5        | 94.1 (4)  |
| N1—C15—H15A    | 108.6      | F6—P1—F5        | 89.7 (3)  |
| C14—C15—H15B   | 108.6      | F2—P1—F5        | 178.7 (4) |
| N1—C15—H15B    | 108.6      | F4—P1—F5        | 86.6 (3)  |
| H15A—C15—H15B  | 107.6      | F1—P1—F3        | 90.2 (3)  |
| C5—C4—C3       | 120.0 (5)  | F6—P1—F3        | 176.0 (3) |
| C5—C4—H4A      | 120.0      | F2—P1—F3        | 89.4 (2)  |
| C3—C4—H4A      | 120.0      | F4—P1—F3        | 87.5 (3)  |
| C26—C27—N1     | 109.9 (3)  | F5—P1—F3        | 90.7 (2)  |
| C26—C27—H27A   | 109.7      |                 |           |
|                |            |                 |           |
| N2—Pt1—N1—C21  | -148.3 (2) | C25—C26—C27—N1  | 153.3 (3) |
| N3—Pt1—N1—C21  | 26.0 (2)   | C21—N1—C27—C26  | 153.1 (3) |
| C11—Pt1—N1—C21 | 170 (5)    | C15—N1—C27—C26  | -84.4 (3) |
| N2—Pt1—N1—C27  | -30.1 (2)  | Pt1—N1—C27—C26  | 39.8 (3)  |
| N3—Pt1—N1—C27  | 144.2 (2)  | C1—C14—C13—C8   | -6.2 (5)  |
| C11—Pt1—N1—C27 | -72 (5)    | C15—C14—C13—C8  | 172.3 (3) |
| N2—Pt1—N1—C15  | 92.6 (2)   | C1—C14—C13—C12  | 174.6 (4) |
| N3—Pt1—N1—C15  | -93.1 (2)  | C15—C14—C13—C12 | -6.9 (5)  |
| C11—Pt1—N1—C15 | 51 (5)     | C11—C12—C13—C8  | -3.1 (7)  |
| N2—Pt1—N3—C16  | -165.9 (4) | C11—C12—C13—C14 | 176.1 (5) |

|                 |            |                 |            |
|-----------------|------------|-----------------|------------|
| C11—Pt1—N3—C16  | -11.3 (3)  | C15—N1—C21—C20  | 88.3 (3)   |
| N2—Pt1—N3—C20   | 13.3 (6)   | Pt1—N1—C21—C20  | -34.8 (3)  |
| N1—Pt1—N3—C20   | -12.7 (2)  | N3—C20—C21—N1   | 27.6 (4)   |
| C11—Pt1—N3—C20  | 167.9 (2)  | C19—C20—C21—N1  | -157.4 (3) |
| N3—Pt1—N2—C26   | -10.6 (6)  | N2—C26—C25—C24  | -0.2 (6)   |
| N1—Pt1—N2—C26   | 15.5 (2)   | C27—C26—C25—C24 | 175.2 (4)  |
| C11—Pt1—N2—C26  | -165.2 (2) | N3—C20—C19—C18  | 1.6 (6)    |
| N3—Pt1—N2—C22   | 170.8 (4)  | C21—C20—C19—C18 | -173.1 (4) |
| N1—Pt1—N2—C22   | -163.1 (3) | C17—C18—C19—C20 | -1.1 (7)   |
| C11—Pt1—N2—C22  | 16.3 (3)   | C20—N3—C16—C17  | -0.6 (5)   |
| C8—C9—C10—C11   | -2.5 (11)  | Pt1—N3—C16—C17  | 178.5 (3)  |
| C12—C11—C10—C9  | 3.8 (11)   | C19—C18—C17—C16 | -0.2 (7)   |
| C10—C11—C12—C13 | -0.9 (9)   | N3—C16—C17—C18  | 1.0 (6)    |
| C4—C3—C2—C1     | 0.3 (7)    | C14—C1—C6—C7    | -0.2 (6)   |
| C16—N3—C20—C19  | -0.7 (5)   | C2—C1—C6—C7     | 179.6 (4)  |
| Pt1—N3—C20—C19  | -180.0 (3) | C14—C1—C6—C5    | -179.8 (4) |
| C16—N3—C20—C21  | 174.3 (3)  | C2—C1—C6—C5     | 0.0 (6)    |
| Pt1—N3—C20—C21  | -5.0 (4)   | C14—C13—C8—C7   | 3.8 (6)    |
| C13—C14—C1—C6   | 4.3 (5)    | C12—C13—C8—C7   | -176.9 (4) |
| C15—C14—C1—C6   | -174.1 (3) | C14—C13—C8—C9   | -174.9 (4) |
| C13—C14—C1—C2   | -175.4 (4) | C12—C13—C8—C9   | 4.4 (6)    |
| C15—C14—C1—C2   | 6.1 (5)    | C10—C9—C8—C7    | 179.5 (6)  |
| C3—C2—C1—C6     | 0.5 (6)    | C10—C9—C8—C13   | -1.7 (9)   |
| C3—C2—C1—C14    | -179.7 (4) | C13—C8—C7—C6    | 0.3 (7)    |
| C22—N2—C26—C25  | -0.9 (5)   | C9—C8—C7—C6     | 179.1 (5)  |
| Pt1—N2—C26—C25  | -179.6 (3) | C1—C6—C7—C8     | -2.1 (7)   |
| C22—N2—C26—C27  | -176.7 (3) | C5—C6—C7—C8     | 177.4 (4)  |
| Pt1—N2—C26—C27  | 4.6 (4)    | C26—N2—C22—C23  | 0.8 (6)    |
| C13—C14—C15—N1  | -90.2 (4)  | Pt1—N2—C22—C23  | 179.3 (3)  |
| C1—C14—C15—N1   | 88.3 (4)   | C24—C23—C22—N2  | 0.5 (8)    |
| C21—N1—C15—C14  | 171.8 (3)  | C26—C25—C24—C23 | 1.5 (7)    |
| C27—N1—C15—C14  | 47.2 (4)   | C22—C23—C24—C25 | -1.6 (8)   |
| Pt1—N1—C15—C14  | -70.8 (3)  | C3—C4—C5—C6     | 2.3 (8)    |
| C2—C3—C4—C5     | -1.7 (8)   | C7—C6—C5—C4     | 179.0 (5)  |

**Table S5.** Bond lengths (Å) and angles (°) of hydrogen bonds for Compound 1

| $D-H\cdots A$              | $D-H$ | $H\cdots A$ | $D\cdots A$ | $D-H\cdots A$ |
|----------------------------|-------|-------------|-------------|---------------|
| C(20)-H(20A) ..Cl(1)       | 0.93  | 2.80        | 3.545(5)    | 137           |
| Intra C(21)-H(21A) ..Cl(2) | 0.93  | 2.72        | 3.291(5)    | 121           |
| C(26)-H(26A) ..Cl(2)       | 0.93  | 2.76        | 3.328(5)    | 120           |
| Intra C(27)-H(27A) ..Cl(1) | 0.93  | 2.81        | 3.620(5)    | 147           |

Symmetry codes: (i)  $1/2-x, 1/2+y, 1/2+z$ ; (ii)  $1/2-x, -1/2+y, 1/2+z$

**Table S7.** Bond lengths (Å) and angles (°) of hydrogen bonds for Compound 2

| $D-H\cdots A$              | $D-H$ | $H\cdots A$ | $D\cdots A$ | $D-H\cdots A$ |
|----------------------------|-------|-------------|-------------|---------------|
| Intra C(15)-H(15A) ..Cl(1) | 0.95  | 2.62        | 3.27(4)     | 125           |
| C(20)-H(20A) ..Cl(1)       | 0.95  | 2.79        | 3.64(5)     | 149           |
| Intra C(21)-H(21A) ..Cl(2) | 0.94  | 2.74        | 3.36(5)     | 123           |
| C(22)-H(22A) ..Cl(2)       | 0.98  | 2.65        | 3.56(6)     | 155           |
| Intra C(27)-H(27A) ..Cl(2) | 0.96  | 2.73        | 3.34(6)     | 122           |
| Intra C(29)-H(29C) ..Cl(1) | 0.99  | 2.71        | 3.30(7)     | 118           |

Symmetry codes: (i)  $2/3-x, 1/3-y, 1/3-z$ ; (ii)  $x-y, x, -z$

**Table S6.** Bond lengths (Å) and angles (°) of hydrogen bonds for Compound 3

| $D-H\cdots A$              | $D-H$ | $H\cdots A$ | $D\cdots A$ | $D-H\cdots A$ |
|----------------------------|-------|-------------|-------------|---------------|
| C(15)-H(15A) ..F(3)        | 0.99  | 2.50        | 3.2461      | 132           |
| C(15)-H(15A) ..F(5)        | 0.99  | 2.52        | 3.4874      | 165           |
| Intra C(16)-H(16A) ..Cl(1) | 0.95  | 2.79        | 3.3512      | 118           |
| C(19)-H(19A) ..Cl(1)       | 0.95  | 2.72        | 3.5292      | 143           |
| C(21)-H(21B) ..Cl(1)       | 0.99  | 2.79        | 3.7378      | 161           |
| Intra C(22)-H(22A) ..Cl(1) | 0.95  | 2.77        | 3.3177      | 118           |
| C(23)-H(23A) ..F(6)        | 0.95  | 2.54        | 3.3353      | 142           |
| C(25)-H(25A) ..F(4)        | 0.95  | 2.55        | 3.4044      | 151           |
| C(27)-H(27B) ..Cl(1)       | 0.99  | 2.65        | 3.5904      | 159           |

Symmetry codes: (i)  $-x, -y, 2-z$ ; (ii)  $1+x, y, z$ ; (iii)  $1-x, -y, 1-z$ ; (iv)  $-x, 1-y, 1-z$ ; (v)  $1-x, 1-y, 1-z$
